# Supplementary material for: Transparent deoxyribonucleic acid substrate with high mechanical strength for flexible and biocompatible organic resistive memory devices
Source: Royal Society of Chemistry journal article supplement (doi:10.1039/c6cc07648c), 2016-01-01
Supplement: c6cc07648c1.pdf [file c6cc07648c1.pdf]

## **Electronic Supplementary Information**

Transparent Deoxyribonucleic Acid Substrate with High Mechanical  
Strength for Flexible and Biocompatible Organic Resistive Memory  
Devices

Chien-Chung Shih,<sup>a</sup> Cheng-Yu Chung,<sup>a</sup> Jeun-Yan Lam,<sup>a</sup> Hung-Chin Wu,<sup>a</sup>  
Morimitsu Yuma,<sup>b</sup> Hisao Matsuno<sup>b</sup>  
Keiji Tanaka<sup>b,\*</sup> and Wen-Chang Chen<sup>a,\*</sup>

a. Department of Chemical Engineering, National Taiwan University,  
Taipei 10617, Taiwan.

b. Department of Applied Chemistry, Kyushu University, Fukuoka 819-  
0395, Japan

\* To whom all correspondence should be addressed.

E-mail: chenwc@ntu.edu.tw (W.-C. Chen), [k-tanaka@cstf.kyushu-  
u.ac.jp](mailto:k-tanaka@cstf.kyushu-u.ac.jp) (K. Tanaka)

## **Experimental**

### **Materials**

Commercially available powdered DNA sodium salt from salmon sperm (lot number EMW1909) with a broad molecular weight, ranging from 300k to 9M, was purchased from Wako (Osaka, Japan) and used without further purification. A 10 mg ml<sup>-1</sup> of Ag NWs solution suspended in ethanol was purchased from Blue Nano Inc. The diameter and length of Ag NWs were 90±20 nm and 30 nm, respectively.

### **Cross-linking DNA powder synthesis**

DNA powder (1275mg) was dissolved in 1:10 (v/v) acetic acid/ ultrapure water (25ml). The ultrapure water was purified by a Milli-Q system (Millipore, Billerica, MA, USA). The DNA solution was mixed by inversion at room temperature for 2 days to dissolve DNA completely. 2,5-hexanedione (0.310mL) and 2-picoline borane (545mg) were added to the solution. The reaction mixture was mixed at 338 K for 1hr to carry out the cross-linking reaction. The reaction was terminated by adding the cross-linked DNA (DNA-c) of an excess amount of ethanol. The precipitated DNA-c bulk was then washed with 7:3 (v/v) ethanol/ ultrapure water solution and vacuum dried at room temperature for one day.

### **Characterization**

FT-IR spectra of the prepared films were recorded by a DIGILAB FTS-3500GX spectrophotometer. Transmittance spectra were measured by using a UV-VIS-NIR spectrophotometer (Hitachi, U4100). Sample morphology and microstructure were characterized by scanning electron microscopy (SEM; Nova NanoSEM 230) and optical microscopy (Olympus BX53). The sheet resistance was measured according to four point probe technique using a Keithley 2400. Average data were obtained from the analysis of at least 5 devices.

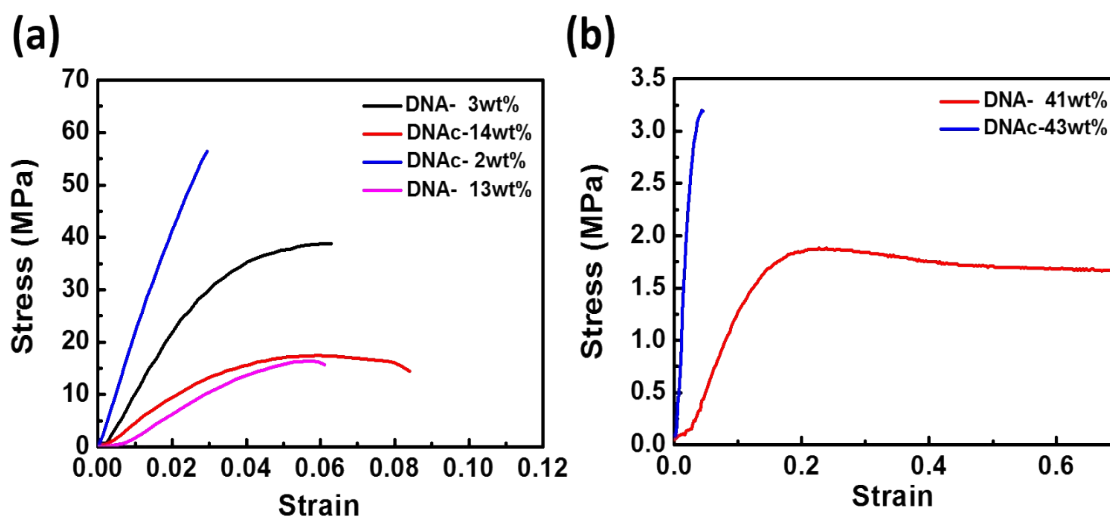

**Fig. S1** Stress–strain curves of the DNAC and DNA films. (a) In low water content region, the water content of DNAC films were 2wt% and 14wt%. For DNA films were 3wt%, 13wt%. (b) In high water content region, the water content of DNAC film was 43wt% and DNA film was 42wt%, respectively.(High water content region).The measurements were performed at room temperature with a crosshead speed of  $5 \text{ mm min}^{-1}$

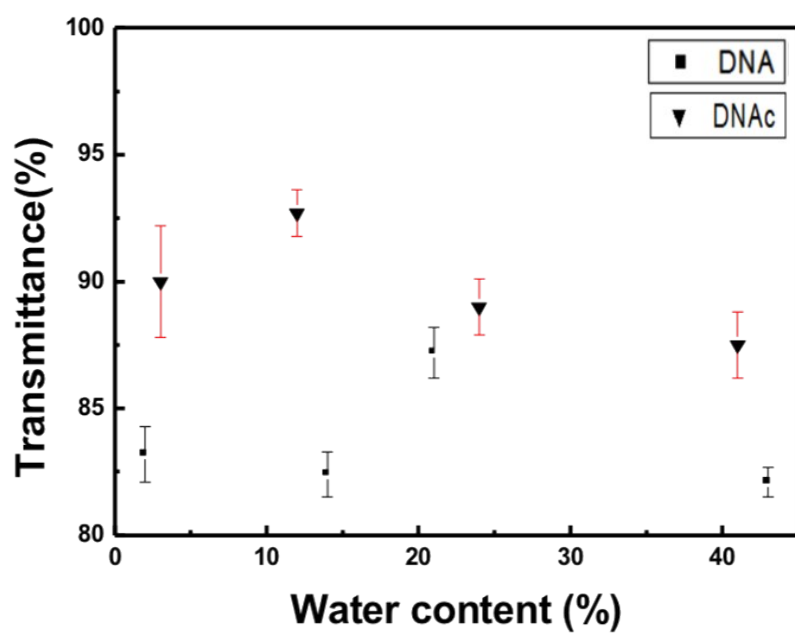

**Fig.S2** (a) Transmittance at 550nm vs. Water content plot of DNA and DNAC films.

(a)

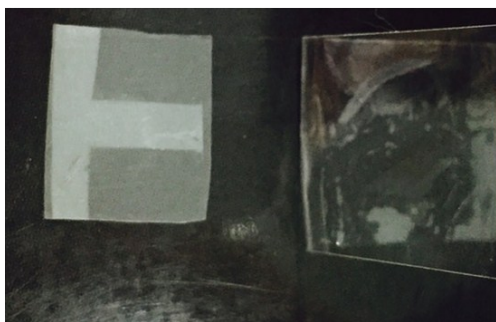

(b)

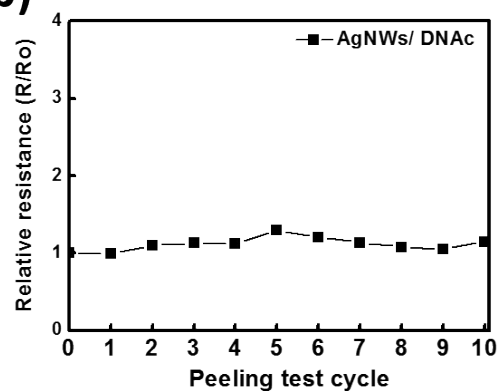

**Fig.S3** The adhesion test of the AgNWs to DNAc surface monitored using the taping test. (a) Optical images of 3M scotch tape peel T-shape AgNWs/ DNAc films. (b) Variation of the sheet resistance of AgNWs/ DNAc film as a function of peeling time.
